# Maternal dietary choline deficiencies during pregnancy and lactation reduce cerebral blood flow in 3-month-old female mice offspring following ischemic stroke to the sensorimotor cortex

1 **Kasey Pull BA<sup>1</sup>, Robert Folk BS<sup>1</sup>, Jeemin Kang MA<sup>1,2</sup>, Shaley Jackson BSc<sup>3</sup>, Brikena Gusek**  
2 **BS<sup>1</sup>, Mitra Esfandiarei PhD<sup>1,3,4,5</sup>, Nafisa M. Jadavji PhD<sup>1,2,3,6</sup>**

3 <sup>1</sup> Department of Biomedical Sciences, Midwestern University, Glendale, AZ, USA

4 <sup>2</sup> College of Osteopathic Medicine, Midwestern University, Glendale, AZ, USA

5 <sup>3</sup> College of Veterinary Medicine, Midwestern University, Glendale, AZ, USA

6 <sup>4</sup> Basic Medical Sciences, College of Medicine Phoenix, University of Arizona, Phoenix, AZ, USA

7 <sup>5</sup> Anesthesiology, Pharmacology, & Therapeutics, Faculty of Medicine, University of British Columbia,  
8 BC, Canada

9 <sup>6</sup> Department of Neuroscience, Carleton University, Ottawa, ON, Canada

10 **\* Correspondence:**

11 Nafisa M. Jadavji, PhD

12 njadav@midwestern.edu

13 **Keywords:** one-carbon metabolism, ischemic stroke, maternal diet, blood flow

14

## 15 **Abstract**

16 A maternal diet that provides adequate nutrition during pregnancy and lactation is vital to the  
17 neurodevelopment of offspring. One-carbon metabolism plays an important role in the closure of the  
18 neural tube of the developing embryo; however, the impact of maternal one-carbon dietary deficiencies  
19 on offspring neurological function later in life remains relatively unknown. Stroke is one of the leading  
20 causes of death globally, and its prevalence is expected to increase in younger age groups as the  
21 incidence of various risk factors for stroke increases. The aim of our study was to determine the impact  
22 of maternal nutritional deficiencies on cerebral blood flow and peripheral hemodynamics after  
23 ischemic stroke in adult offspring. In this study, adult female C57BL/6J mice were placed on either  
24 control (CD), choline (ChDD) or folic acid (FADD) deficient diets for four weeks to deplete stores  
25 prior to mating and maintained on the assigned diet during pregnancy and lactation. Female offspring  
26 were weaned and transitioned to a CD for the duration of the study. Ischemic stroke was induced in the  
27 sensorimotor cortex of 2- and 10-month-old female offspring using the photothrombosis model. Six  
28 weeks after induction of stroke, cerebral and peripheral blood flow was measured using the Vevo2100  
29 Pulse Wave Doppler tracing modality. Our data showed that 3.5-month-old female offspring from a  
30 ChDD mothers had reduced blood flow in the posterior cerebral artery compared to CD mice; this  
31 effect disappeared in older offspring. In 11.5-month-old females we observed changes in peripheral  
32 hemodynamics, but not in young animals. Our findings suggest that a maternal dietary deficiency in  
33 choline results in reduced cerebral blood flow in adult female offspring after ischemic stroke, but the  
34 long-term effects are not present. This result points to the key role of the maternal diet in early life  
35 neuro-programming, while emphasizing its effects on both fetal development and long-term  
36 cerebrovascular health.

## 37 **1 Introduction**

38 Maternal nutrition during pregnancy and lactation is recognized as a critical factor determining  
39 the health of offspring (1–5). Early life nutritional cofactors are critical for typical fetal development,  
40 but also in determining offspring disease outcome (6,7). The Developmental Origins of Health and  
41 Disease (DOHaD) theory suggests that prospective chronic diseases are programmed *in utero* (8–11).  
42 When already compensating for fetal nutrient accumulation and increased maternal metabolic demands  
43 (12), altered or insufficient maternal nutrition impacts both early development and future offspring  
44 health. In offspring, maternal dietary deficiencies have been associated with ventricular septal defects  
45 (13) and impaired glucose tolerance (14), as well as modified neural tube closure (15,16) and  
46 neurocognitive development (17–21). Beyond this evidence of suboptimal structural development in  
47 offspring, maternal nutritional deficiencies have been linked to programming of offspring metabolic  
48 (22) and epigenetic (23–28) adaptations, thereby predisposing that individual to life-long  
49 cardiovascular, metabolic, and neuroendocrine dysfunction.

50 Epidemiological studies have demonstrated the effect of maternal diet on lifelong cardiovascular  
51 and neurological function (29–31). Most of this population-level work reveals an effect of poor  
52 maternal health on birthweight and incidence of disease and cardiovascular risk factors in adulthood,  
53 such as hypertension and hyperlipidemia (4,10). Such relationships have been shown in numerous  
54 global populations and are apparent from birth through early childhood (32). Folate and choline are  
55 important players in healthy fetal neurodevelopment due to their involvement in the closure of the  
56 neural tube and are components of one-carbon metabolism (33,34). Folate and its chemically  
57 synthesized form folic acid are important for fetal neurodevelopment (35), as folate requirements  
58 during pregnancy are increased by 5- to 10-fold compared to non-pregnant women (36). Maternal  
59 folate and choline levels during pregnancy have also been shown to be important in the development

60 of the cerebellum and hippocampus (37), as well as affecting postnatal myelination trajectories (38),  
61 short-term memory (39), hyperactivity/attention (40), neurocognitive development (41), and risk of  
62 autism spectrum disorder (ASD) (42).

63 Recent work in rodent models has improved mechanistic understanding of how maternal levels  
64 of folate and choline impact neurodevelopmental processes (43). Akin to human epidemiological  
65 studies (29–31), murine maternal folate deficiencies have been implicated in adverse reproductive  
66 performance, implantation, and fetal growth (44). During pregnancy and lactation, maternal dietary  
67 folic acid availability has been shown to influence progenitor cell mitosis, and apoptosis in the fetal  
68 mouse forebrain (45) and hippocampus (39). Investigations of maternal perinatal folate deficiencies  
69 have revealed reduced hippocampal proliferation, impaired vesicular transport and synaptic plasticity,  
70 as well as poor neurite outgrowth (46), modified cellular neocortex composition, and diminished  
71 complexity and arborization of projection neurons (47) in offspring. In addition to these structural  
72 observations, both genetic and epigenetic modifications have been observed; maternal folate  
73 deficiencies reduced expressions levels of brain derived neurotropic factor (BDNF) and H3K9me2 in  
74 the fetal hippocampus, and folic acid deficiency for two generations, significantly enhancing *de novo*  
75 mutations accumulation during meiosis (48). Choline, another one-carbon cofactor implicated in a  
76 number of diverse biological processes (49), has yielded variable results in animal models of  
77 neurodevelopment. Effects of maternal choline deficiencies, such as defective layering of the cortex,  
78 reduced cortical size and brain weight (50), and modified hippocampal electrophysiology (51) and  
79 neurogenesis (52), have been observed in offspring. Beyond these physiological, and histological  
80 findings, choline and folate deficiencies have been shown to elicit similar adverse effects, such as  
81 impaired homocysteine remethylation, oxidative stress, and endothelial dysfunction in murine  
82 cerebrovasculature (59,60); effectively demonstrating the link between maternal one-carbon cofactors  
83 and typical fetal neurodevelopment.

84 The link between maternal nutrition and fetal development is abundantly clear, but the long-  
85 term effects of maternal nutritional deficiencies on adult offspring are less well-studied. Investigating  
86 the links between cerebral and peripheral blood flow and the maternal environment will improve our  
87 understanding of dietary requirements during pregnancy and provide information on the role of  
88 maternal nutrition in early life programming of adult neurovascular diseases, such as ischemic stroke.  
89 Stroke is among the leading causes of death globally and its prevalence as a major health concern is  
90 predicted to increase, as the global population ages and demographics of populations change (53,54).  
91 One of the many reasons these problems exist is that the majority of preclinical studies are targeted  
92 only towards male subjects (55). Over 90% of preclinical studies use strictly male mice whereas all  
93 clinical studies use equal part male and female participants (55,56). This makes clinical pharmaceutical  
94 findings favor better outcomes in males (57,58). The aim of this study was to determine the impact of  
95 perinatal maternal nutritional deficiencies in folic acid or choline on cerebral and peripheral (cardiac  
96 and aortic) hemodynamics flow after ischemic stroke in adult and mid-age female offspring.

## 97 **2 Materials and Methods**

### 98 **2.1 Experimental Design**

99 All animal experimentation was performed following approval by the Midwestern University  
100 Institutional Animal Care and Use Committee in accordance with animal welfare guidelines.

101 Experimental manipulations are summarized in Figure 1. Briefly, for the maternal cohort (n = 30)  
102 female and (n = 30) male C57BL/6J mice were purchased from Jackson Laboratories and acclimatized  
103 for one week to controlled housing conditions (22 ± 1°C, 12h-light/12h-dark cycle) with *ad libitum*

104 access to food and water (RRID: IMSR\_JAX:000664, Jackson Laboratories). At two months of age  
 105 (Day 0), females were randomized to control (CD, TD.190790), and commercially (Envigo) prepared  
 106 folic acid (FADD, TD.01546) or choline deficient (ChDD, TD.06119) diets and maintained on these  
 107 diets for four weeks prior to mating, and later throughout pregnancy and lactation (Figure 1). Levels  
 108 of folic acid and choline bitartrate in experimental diets are listed in in Table 1 (39,59–61).

109 After weaning, female offspring were maintained on the CD *ad libitum*. Offspring were randomized to  
 110 one of two cohorts undergoing photothrombotic (PT) stroke at either 2- or 10-months of age, followed  
 111 by ultrasound measurements at 1.5 months post-stroke.

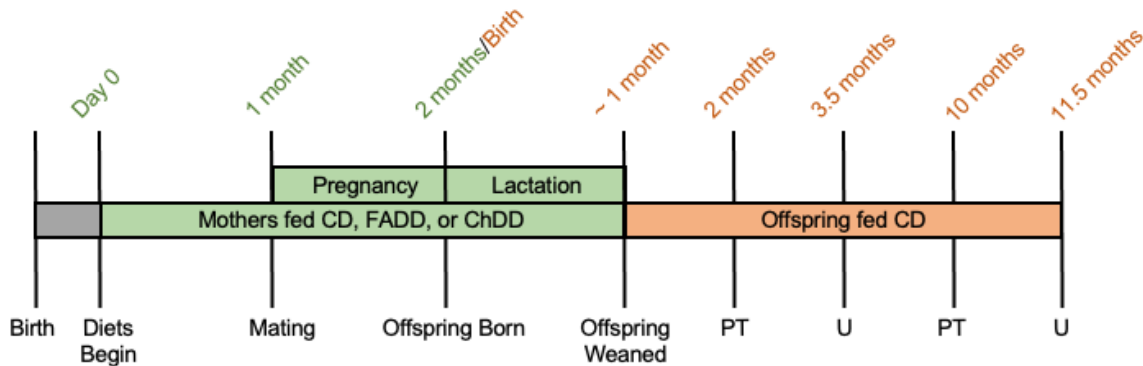

112

113 **Figure 1.** Experimental timeline. Beginning at 2-months-of age female mice were fed either control  
 114 (CD), folic acid (FADD) or choline (ChDD) deficient diets. The female mice were maintained on these  
 115 diets throughout the pregnancy and lactation until the offspring were weaned. Once the offspring were  
 116 weaned, they were fed the CD. Separate cohorts of female offspring at 2 or 10 months of age had  
 117 ischemic stroke induced via the photothrombosis (PT) model. At 3.5 (CD, n = 6 ; FADD, n = 7 ; ChDD,  
 118 n = 6) and 11.5 (CD, n = 6 ; FADD, n = 6; ChDD, n = 6) months of age all female mouse offspring  
 119 underwent ultrasound imaging (U).

120 **Table 1.** Experimental Diets. Concentration (in milligrams/kilogram) of folic acid and choline  
 121 bitartrate in control (CD), folic acid-deficient (FADD), and choline-deficient (ChDD) diets fed to  
 122 mothers throughout pregnancy and lactation.

|                            | Diet    |      |      |
|----------------------------|---------|------|------|
|                            | Control | FADD | ChDD |
| Folic Acid (mg/kg)         | 2       | 0.3  | 2    |
| Choline Bitartrate (mg/kg) | 1150    | 1150 | 300  |

## 123 2.2 Photothrombosis

124 When female offspring reached 2 or 10 months of age, ischemia was induced using the  
 125 photothrombosis model. They were anesthetized with isoflurane (1.5%) in a 70:30 nitrous  
 126 oxide:oxygen mixture. Core body temperature was monitored with a rectal thermometer (Harvard  
 127 Apparatus) and maintained at  $37 \pm 0.2$  °C using a heating blanket. 10 mg/kg of the photosensitive Rose  
 128 Bengal dye was injected intraperitoneally 5 minutes prior to irradiation. A 532 nm green laser was

129 placed 3 cm above the animal and directed to the sensorimotor cortex (mediolateral + 0.24mm) for 15  
130 minutes (59,62–64).

131

### 132 **2.3 Ultrasound imaging**

133 Approximately 1.5 months after ischemic stroke, Vevo® 2100 ultrasound imaging system (FUJIFILM,  
134 Visual Sonics) was used to assess offspring *in vivo* cerebral (Figure 2A) and peripheral vascular  
135 function as previously reported (65,66). Measurements were completed in random order by  
136 investigators blinded to treatment groups. The high-frequency, high-resolution ultrasound system is  
137 equipped with a 40 MHz transducer (MS550S) with a focal length of 7.0 mm, frame rate of 557 fps  
138 (single zone, 5.08 mm width, B-mode), and a maximum two-dimensional field of view of 14.1×15.0  
139 mm with a spatial resolution of 90 μm lateral by 40 μm axial.

140 Mice were anesthetized in an induction chamber with 3% isoflurane and 1 L/min flow of 100% oxygen  
141 for 1–2 mins, then placed supine on a heated platform and maintained with 1.5–2% isoflurane. Heart  
142 rate, electrocardiogram (ECG), and respiratory rate were measured by the four ECG electrodes  
143 embedded in the platform. Using a heat lamp and heated platform, body temperature was maintained  
144 at 36–38°C and monitored by a rectal probe throughout.

145 The left ventricular (LV) structural and functional parameters, including stroke volume, ejection  
146 fraction, fractional shortening, and cardiac output, were calculated from the LV parasternal short-axis  
147 M-mode view and recorded at the level of two papillary muscles. An M-mode cursor was positioned  
148 perpendicular to the anterior and posterior walls in the middle of the LV for measuring wall thickness.  
149 Interventricular septal wall (IVS) thickness during diastole (IVSd) and systole (IVSs) were also  
150 obtained from LV parasternal long-axis M-mode view.

151 Aortic diameters at the annulus, sinuses of Valsalva, and sinotubular junctions were measured from  
152 the B-mode aortic arch view. Ascending and descending aortic, and posterior cerebral artery (PCA)  
153 peak velocities were measured from the pulse wave (PW) Doppler-mode. Pulse wave velocity (PWV)  
154 was obtained from the B-mode and Doppler-mode aortic arch view, calculated as  $PWV \text{ (mm}\cdot\text{s}^{-1}\text{)} =$   
155  $\text{aortic arch distance (d}_2\text{-d}_1\text{)}/\text{transit time (T}_1\text{-T}_2\text{)}$ . The PW Doppler mode sample volume was placed  
156 in the ascending aorta to verify the time from the onset of the QRS complex to the onset of the  
157 ascending aortic Doppler waveform (T1). Using the same image plane, the time from the onset of the  
158 QRS complex to the onset of the descending aortic Doppler waveform (T2) was also measured, and  
159 the average values for T1 and T2 over 10 cardiac cycles were calculated. Furthermore, the aortic arch  
160 distance was measured between the two sample volume positions along the central axis of aortic arch  
161 on the B-mode image.

162 Transcranial Doppler sonography is a non-invasive, non-ionizing, inexpensive, portable, and safe technique that  
163 uses a pulsed Doppler transducer for assessment of intracerebral blood flow in the clinical practice (67,68) and  
164 has become an important translational tool to evaluate the intracerebral blood flow in animal models.

165  
166 The posterior cerebral artery (PCA) peak blood flow was measured using the Vevo 2100 high-resolution  
167 ultrasound system and the 24MHz (MS250) transducer. The trans occipital window was used to visualize the  
168 posterior cerebral arteries and pulsed wave (PW), Doppler-mode was used to measure the PCA peak blood flow  
169 velocity.

170  
171

172

## 173 2.4 Statistics

174 Ultrasound data was analyzed by two individuals that were blinded to experimental treatment groups  
175 using Vevo Lab ultrasound analysis software (VisualSonics, Toronto, Canada). Using GraphPad Prism  
176 9.0., One-way ANOVA analysis was performed to analyze maternal dietary effects, and two-way  
177 ANOVA analysis was performed to assess aging effects. Significant main effects of two-way ANOVAs  
178 were followed up with Tukey's post-hoc test to adjust for multiple comparisons. All data are presented  
179 as mean  $\pm$  standard error of the mean (SEM). Statistical tests were performed using a significance level  
180 ( $P$ ) of 0.05.

## 181 3 Results

### 182 *Cerebral blood flow in offspring after ischemic stroke*

183 In 3.5-month-old offspring, there was a statistically significant difference in blood flow velocity within  
184 the posterior cerebral artery between maternal dietary groups (Figure 2B;  $F [2, 15] = 4.07, p = 0.04$ ).  
185 Female offspring of ChDD mothers had significantly impaired blood flow velocity in the PCA  
186 compared to offspring from the CD group ( $p = 0.04$ ). A maternal FADD reduced blood flow velocity  
187 in female offspring, but this did not reach significance ( $p = 0.14$ ). In 11.5-month-old offspring, no  
188 statistically significant differences in cerebral blood flow velocity were observed between maternal  
189 diet groups (Figure 2C;  $F [2, 13] = 4.07, p = 0.08$ ).

190

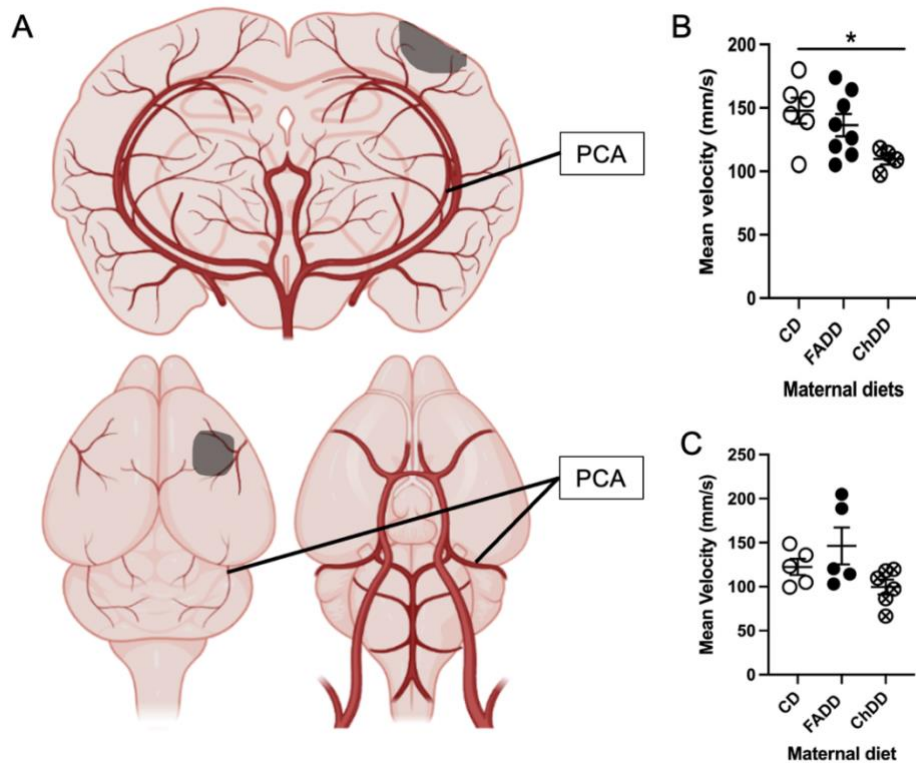

**Figure 2.** (A) Visual representation of mouse cerebral vasculature, posterior cerebral artery (PCA) and location of ischemic stroke. Blood flow velocity in the PCA after ischemic stroke in 3.5- (B) and 11.5- (C) month-old female offspring from control (CD), folic acid (FADD) and choline (ChDD) deficient diet mothers. Scatter plot with mean  $\pm$  SEM of 5 to 7 mice per group. \*  $p < 0.05$ , Tukey's pairwise comparison.

212

213

214 **Cardiac/Aortic (Peripheral) hemodynamics in offspring after ischemic stroke**

215 In 3.5-month-old offspring, no differences in cardiac/aortic (peripheral) hemodynamics were observed  
 216 between maternal diet groups (Table 2). In 11.5-month-old offspring, there was a statistically  
 217 significant difference in the coronary artery velocity ratio between maternal diet groups (Table 3;  $F(2,$   
 218  $13) = 4.07, p = 0.08$ ). Female offspring of FADD mothers had a significantly increased  
 219 systolic/diastolic ratio in the coronary artery compared to controls.

220 **Table 2.** Descriptive statistics (Mean  $\pm$  SEM) of peripheral hemodynamics in 3.5-month-old female  
 221 mouse offspring by maternal diet. Maternal diets included a control diet (CD), a folic acid deficient  
 222 diet (FADD), and a choline deficient diet (ChDD). Mean  $\pm$  SEM of 5 to 7 mice per group.

| Measurement                                      | Maternal Diet     |                   |                   | <i>p-value</i> |
|--------------------------------------------------|-------------------|-------------------|-------------------|----------------|
|                                                  | CD                | FADD              | ChDD              |                |
| Average Heart Rate (BPM)                         | 494.2 $\pm$ 13.23 | 504.5 $\pm$ 12.68 | 513.0 $\pm$ 9.55  | 0.57           |
| Average Stroke Volume (uL)                       | 24.04 $\pm$ 2.54  | 28.67 $\pm$ 2.17  | 25.26 $\pm$ 2.06  | 0.33           |
| Average Ejection Fraction (%)                    | 86.57 $\pm$ 4.24  | 84.68 $\pm$ 3.09  | 86.46 $\pm$ 2.3   | 0.90           |
| Average Fractional Shortening (%)                | 57.94 $\pm$ 6.28  | 53.89 $\pm$ 3.67  | 54.89 $\pm$ 3.13  | 0.81           |
| Average Cardiac Output (mL/min)                  | 11.77 $\pm$ 1.04  | 14.43 $\pm$ 1.08  | 12.94 $\pm$ 1.03  | 0.22           |
| Coronary Artery Velocity Ratio (S/D)             | 0.34 $\pm$ 0.05   | 0.29 $\pm$ 0.02   | 0.36 $\pm$ 0.14   | 0.40           |
| Aortic Pulse Wave Velocity (mm·s <sup>-1</sup> ) | 1.23 $\pm$ 0.24   | 3.52 $\pm$ 1.95   | 4.24 $\pm$ 3.28   | 0.57           |
| Left Internal Diameter in Systolic (IVSs)        | 173.7 $\pm$ 28.62 | 163.7 $\pm$ 18.58 | 125.4 $\pm$ 19.83 | 0.42           |
| Left Internal Diameter in Diastolic (IVSd)       | 531.2 $\pm$ 83.17 | 574.5 $\pm$ 45.33 | 361.9 $\pm$ 53.26 | 0.11           |

223

224 **Table 3.** Descriptive statistics (Mean  $\pm$  SEM) of peripheral hemodynamics in 11.5-month-old female  
 225 mouse offspring by maternal diet. Maternal diets included a control diet (CD), a folic acid deficient  
 226 diet (FADD), and a choline deficient diet (ChDD). Mean  $\pm$  SEM of 5 to 7 mice per group.

| Measurement                                      | Maternal Diet     |                   |                   | <i>p-value</i> |
|--------------------------------------------------|-------------------|-------------------|-------------------|----------------|
|                                                  | CD                | FADD              | ChDD              |                |
| Average Heart Rate (BPM)                         | 524.8 $\pm$ 8.82  | 531.4 $\pm$ 4.02  | 531.3 $\pm$ 6.02  | 0.64           |
| Average Stroke Volume (uL)                       | 23.55 $\pm$ 4.55  | 37.47 $\pm$ 5.56  | 38.24 $\pm$ 2.08  | 0.05           |
| Average Ejection Fraction (%)                    | 84.88 $\pm$ 3.55  | 85.05 $\pm$ 2.85  | 74.93 $\pm$ 4.24  | 0.10           |
| Average Fractional Shortening (%)                | 53.65 $\pm$ 4.18  | 53.92 $\pm$ 3.88  | 43.70 $\pm$ 4.04  | 0.11           |
| Average Cardiac Output (mL/min)                  | 20.32 $\pm$ 0.78  | 19.91 $\pm$ 2.97  | 20.28 $\pm$ 0.96  | 0.90           |
| Coronary Artery Velocity Ratio (S/D)             | 0.27 $\pm$ 0.02   | 0.39 $\pm$ 0.04   | 0.28 $\pm$ 0.02   | 0.04*          |
| Aortic Pulse Wave Velocity (mm·s <sup>-1</sup> ) | 3.28 $\pm$ 0.46   | 5.52 $\pm$ 2.83   | 6.11 $\pm$ 2.28   | 0.52           |
| Left Internal Diameter in Systolic (IVSs)        | 90.72 $\pm$ 29.49 | 159.3 $\pm$ 27.05 | 167.5 $\pm$ 26.45 | 0.18           |
| Left Internal Diameter in Diastolic (IVSd)       | 663.0 $\pm$ 72.03 | 427.8 $\pm$ 62.76 | 545.6 $\pm$ 58.14 | 0.10           |

227

228 ***The impact of aging on cerebral blood flow and cardiac/aortic hemodynamics***

229 We compared the 3.5 and 11.5-month female cerebral and cardiac/aortic (peripheral) hemodynamics  
230 measurements (Table 4). For fractional shortening and end systole septal diameter, no differences were  
231 observed between experimental groups. However, further analysis revealed significant effects on other  
232 peripheral hemodynamic measures. Main effects of diet ( $p = 0.03$ ) and offspring age ( $p = 0.001$ ) were  
233 observed for average heart rate. While exclusively offspring age effects were observed for ejection  
234 fraction ( $p = 0.01$ ), cardiac output ( $p < 0.0001$ ), and pulse wave velocity ( $p < 0.0001$ ). Finally,  
235 significant interaction effects were observed for stroke volume ( $p = 0.03$ ), coronary artery velocity  
236 ratio ( $p = 0.02$ ), and end diastole septal diameter ( $p = 0.04$ ).

237



238 **Table 4.** Descriptive statistics (Mean  $\pm$  SEM) of central and peripheral blood flow in 3.5 and 11.5-  
 239 month-old female mouse offspring. Maternal diets included a control diet (CD), a folic acid deficient  
 240 diet (FADD), and a choline deficient diet (ChDD). Mean  $\pm$  SEM of 5 to 7 mice per group.

| Measurement                                | Maternal Diet | Offspring Age      |                    | <i>p-values</i> |          |            |
|--------------------------------------------|---------------|--------------------|--------------------|-----------------|----------|------------|
|                                            |               | 3.5 months         | 11.5 months        | Diet            | Age      | Diet x Age |
| Posterior Cerebral Artery (mm/s)           | CD            | 147.74 $\pm$ 10.24 | 122.37 $\pm$ 9.24  | 0.009           | 0.37     | 0.30       |
|                                            | FADD          | 136.43 $\pm$ 8.78  | 146.27 $\pm$ 21.01 |                 |          |            |
|                                            | ChDD          | 109.74 $\pm$ 4.38  | 99.62 $\pm$ 8.4    |                 |          |            |
| Average Heart Rate (BPM)                   | CD            | 474.53 $\pm$ 15.19 | 524.78 $\pm$ 8.82  | 0.03*           | 0.001*   | 0.1374     |
|                                            | FADD          | 515.96 $\pm$ 5.84  | 531.42 $\pm$ 4.02  |                 |          |            |
|                                            | ChDD          | 511.16 $\pm$ 11.30 | 531.30 $\pm$ 6.02  |                 |          |            |
| Average Stroke Volume (uL)                 | CD            | 24.04 $\pm$ 2.54   | 23.55 $\pm$ 4.55   | 0.2744          | 0.2319   | 0.03*      |
|                                            | FADD          | 28.67 $\pm$ 2.17   | 37.47 $\pm$ 5.56   |                 |          |            |
|                                            | ChDD          | 25.26 $\pm$ 2.06   | 38.24 $\pm$ 2.08   |                 |          |            |
| Average Ejection Fraction (%)              | CD            | 86.58 $\pm$ 4.24   | 84.88 $\pm$ 3.55   | 0.1638          | 0.009*   | 0.2929     |
|                                            | FADD          | 84.68 $\pm$ 3.09   | 73.10 $\pm$ 4.61   |                 |          |            |
|                                            | ChDD          | 86.46 $\pm$ 2.30   | 74.05 $\pm$ 2.49   |                 |          |            |
| Average Fractional Shortening (%)          | CD            | 57.94 $\pm$ 6.28   | 53.65 $\pm$ 4.18   | 0.3924          | 0.1811   | 0.4998     |
|                                            | FADD          | 53.89 $\pm$ 3.67   | 53.92 $\pm$ 3.88   |                 |          |            |
|                                            | ChDD          | 54.89 $\pm$ 3.13   | 43.70 $\pm$ 4.04   |                 |          |            |
| Average Cardiac Output (mL/min)            | CD            | 11.77 $\pm$ 1.04   | 20.32 $\pm$ 0.78   | 0.7197          | <0.0001* | 0.5400     |
|                                            | FADD          | 14.43 $\pm$ 1.08   | 19.91 $\pm$ 2.94   |                 |          |            |
|                                            | ChDD          | 12.94 $\pm$ 1.03   | 20.28 $\pm$ 0.96   |                 |          |            |
| Coronary Artery Velocity Ratio (S/D)       | CD            | 0.32 $\pm$ 0.04    | 0.27 $\pm$ 0.02    | 0.3813          | 0.9454   | 0.02*      |
|                                            | FADD          | 0.29 $\pm$ 0.02    | 0.39 $\pm$ 0.04    |                 |          |            |
|                                            | ChDD          | 0.36 $\pm$ 0.07    | 0.28 $\pm$ 0.02    |                 |          |            |
| Pulse Wave Velocity (mm·s <sup>-1</sup> )  | CD            | 1.23 $\pm$ 0.24    | 3.29 $\pm$ 0.46    | 0.8061          | <0.0001* | 0.1498     |
|                                            | FADD          | 1.58 $\pm$ 0.18    | 2.71 $\pm$ 0.36    |                 |          |            |
|                                            | ChDD          | 0.97 $\pm$ 0.18    | 3.92 $\pm$ 0.74    |                 |          |            |
| Left Internal Diameter in Systolic (IVSs)  | CD            | 173.72 $\pm$ 28.62 | 180.53 $\pm$ 24.50 | 0.4980          | 0.4745   | 0.6540     |
|                                            | FADD          | 163.72 $\pm$ 18.58 | 159.27 $\pm$ 27.05 |                 |          |            |
|                                            | ChDD          | 125.35 $\pm$ 19.83 | 167.50 $\pm$ 26.45 |                 |          |            |
| Left Internal Diameter in Diastolic (IVSd) | CD            | 531.18 $\pm$ 83.17 | 662.98 $\pm$ 72.03 | 0.1063          | 0.3048   | 0.03*      |
|                                            | FADD          | 574.46 $\pm$ 45.33 | 427.78 $\pm$ 62.76 |                 |          |            |
|                                            | ChDD          | 361.92 $\pm$ 53.26 | 545.59 $\pm$ 58.14 |                 |          |            |

## 242 4. Discussion

243 The Developmental Origins of Health and Disease (DOHaD) theory suggests that prospective chronic  
244 diseases are programmed in utero- giving rise to programming of offspring cardiovascular, metabolic,  
245 and neuroendocrine dysfunction (8–11). Despite impressive evidence of the importance of the maternal  
246 environment for fetal growth and development, there have been few investigations surrounding the  
247 effects of maternal nutrition on cerebrovascular function in fully developed or adult offspring. Using  
248 an experimental model of ischemic stroke, our study aimed to determine the impact of perinatal  
249 maternal nutritional deficiencies in 1C metabolites on measures of cerebral and peripheral blood flow  
250 and cardiac function in offspring, following ischemic injury. Our results demonstrate a significant  
251 impairment in cerebral blood flow velocity following stroke in 3.5-month-old, but not 11.5-month-old  
252 offspring from choline-deficient mothers. However, 11.5-month-old offspring from folic acid-deficient  
253 mothers did display a significant increase in peripheral hemodynamic measures, including the coronary  
254 artery velocity ratio. Effects of both diet and offspring age, as well as interactions between these  
255 variables were observed for numerous peripheral indices.

256 The neurovascular unit (NVU) is comprised of a number of unique neuronal, glial, and endothelial cell  
257 types, and recent findings indicate unique cross-talk between neurons and the cerebral vasculature (69–  
258 72), emphasizing the complex, pivotal role the NVU plays during development and in the progression  
259 of neurovascular pathologies like ischemic stroke and neurodegenerative disorders (73–78). Further,  
260 the NVU is responsible for the maintenance of a highly selective blood–brain barrier (BBB) and  
261 cerebral homeostasis, as well as the control of cerebral blood flow (CBF) (79). The impact of maternal  
262 diet on the NVU, modulating integrity of cerebral blood vessels and closure of the neural tube, has  
263 been established (15,16,80–82). Our study adds to these investigations by assessing the hemodynamic  
264 response of blood flow within the posterior cerebral artery (PCA) in both young and aged offspring.  
265 The contralesional PCA was selected as an index of cerebral blood flow due to its spatial and functional  
266 independence from the sensorimotor cortex targeted during photothrombotic stroke (83), and evident  
267 correlation to measures of the Middle Cerebral Artery (MCA) (84).

268 In line with studies detailing the impact of maternal choline on neurovascular development (16), our  
269 results suggest that maternal choline levels during pregnancy and lactation impair cerebral blood flow  
270 in young mice following ischemic stroke. In rodent models, the importance of choline for optimal  
271 neurodevelopment is well-established (85,86). Recent work has examined the role of choline in  
272 neurovascular interactions as well, modulating levels of anti-angiogenic factors during gestation (87),  
273 fetal hippocampal angiogenesis (37), and promoting the proliferation of rat endothelial cells following  
274 hypoxic injury in cerebral vessels (88). In this way, choline has been shown to influence neurovascular  
275 health across the lifespan and may be implicated in both neurovascular structure and functional  
276 response to injury. The cardiovascular system has also demonstrated effects of choline deficiency,  
277 including heart defects (89,90), while higher intake of choline was associated with reduced risk of adult  
278 cardiovascular disease (91) and amelioration of impaired vagal activity and inflammation in  
279 hypertensive rodents (92). Our study revealed a diet effect of both maternal choline and folic acid,  
280 where deficiencies in either nutrient significantly increased offspring heart rate, regardless of offspring  
281 age. While heart rate is a well-known risk factor for cardiovascular disease, our results align well with  
282 recent findings associating low heart rate with better functional and cognitive outcomes following  
283 ischemic stroke (93) and high heart rate with impaired endothelial function and increased ischemic  
284 lesion size following stroke (94), as well as death due to vascular diseases (93). Overall, maternal diet  
285 has an established developmental influence on basic measures of cardiovascular and neurovascular  
286 health, and may impact offspring programming of the NVU, thereby influencing stroke protection via  
287 endothelial homeostasis via endothelial NO synthase (eNOS) (95,96).

288 We did not observe an effect of maternal diet on cerebral blood flow in 11.5-month-old offspring. This  
289 could be due to the well-investigated aging-associated changes in the structural and functional integrity  
290 of the vasculature (97–101). Therefore, we propose that the difference in effect between young  
291 (3.5m.o.) and old (11.5m.o.) offspring is a result of the aging of the control mice. In addition, the  
292 presumed damage or endothelial dysfunction induced by the deficient diets is long-lasting and may  
293 contribute to premature aging, generating a mathematically significant difference when compared to  
294 young, healthy controls, but only a minor difference when compared to senescent offspring displaying  
295 similar levels of vascular dysfunction. This result is supported by the interaction effect of diet and  
296 offspring age and requires further investigation. In addition, unique mechanisms drive vascular  
297 senescence in males and females (102), so our results may be obscured by our study of exclusively  
298 female mice. Another interesting result from our study is the significance of the coronary artery  
299 velocity (S/D) ratio in 11.5-month-old offspring. In this assessment, folic acid significantly increased  
300 the ratio, as occurs with moderate coronary atherosclerosis (103). This result may indicate  
301 cardiovascular impairment related to a maternal diet deficient in choline. However, because the  
302 incidence of coronary artery disease (CAD), valvular disease, rhythm disorders, and heart failure  
303 increases with age (104), it appears that folic acid may play a role in programming resistance to this  
304 age-related dysfunction.

305 Outside of heart rate, which is discussed above, age effects were observed for offspring ejection  
306 fraction, cardiac output, and pulse wave velocity. Ejection fraction, an index of the left ventricular  
307 output, has recently been used as a measure of cardiac mortality risk (105), with lower percentages  
308 indicating cardiac dysfunction. In our study, older mice displayed a significantly reduced ejection  
309 fraction, indicating cardiovascular impairment. In a similar manner, our cardiac output data indicate  
310 the expected increased cardiac dysfunction as a product of aging (106). Aortic pulse wave velocity  
311 (PWV) was also found to be significantly increased on the older cohort, in line with clinical findings  
312 (107). Finally, interactions between maternal folic acid deficiency and offspring age were found for  
313 the coronary artery velocity S/D ratio, an indicator of coronary atherosclerosis, and interventricular  
314 septal end diastole (IVSd), an indicator of ventricular hypertrophy.

315 Overall, our data points to the need for rodent models spanning a variety of ages for research in age-  
316 related diseases such as stroke and vascular dysfunction. We recognize that the exclusion of male  
317 subjects in this study may limit our ability to draw conclusions with respect to the impact of sex  
318 hormone in observed phenomenon. In future studies, we plan to include male animals, and design  
319 experiments that would allow us to investigate the role of paternal dietary effects. Additionally, we  
320 plan to further age animals to ~20mo after ischemic stroke as well as investigate the role of over  
321 supplementation on blood flow after stroke. A detailed analysis of angiogenesis after ischemic stroke  
322 might also be prudent. In conclusion, 1C metabolism metabolites have potentially compensatory, but  
323 unique roles. Maternal nutrition during pregnancy and lactation has effects, even after infancy and  
324 childhood. Our work demonstrated an age effect in animal models encourages further comprehensive  
325 longitudinal time-point studies that includes older age animals.

326

### 327 **3 Conflict of Interest**

328 *The authors declare that the research was conducted in the absence of any commercial or financial*  
329 *relationships that could be construed as a potential conflict of interest.*

### 330 **4 Author Contributions**

331 **Kasey Pull:** data analysis, writing – original draft, writing – review and editing. **Robert Folk:**  
332 investigation and data analysis. **Jeemin Kang:** data analysis. Shaley Jackson: data analysis. **Brikena**  
333 **Gusek:** investigation and data analysis. **Mitra Esfandiari:** Conceptualization, writing – review and  
334 editing, funding acquisition. **Nafisa M. Jadavji:** conceptualization, investigation, resources, data  
335 curation, writing – original draft, writing – review and editing, visualization, supervision, project  
336 administration, and funding acquisition

### 337 **5 Funding**

338 Grants awarded to Mitra Esfandiari; R15HL145646 (NIH) and Nafisa M. Jadavji;  
339 20AIREA35050015 (American Heart Association; 20AIREA35050015)

### 340 **6 Acknowledgments**

341 Not applicable

### 342 **7 References**

- 343 1. Gernand AD, Schulze KJ, Stewart CP, West KP, Christian P. Micronutrient deficiencies in  
344 pregnancy worldwide: health effects and prevention. *Nat Rev Endocrinol*. 2016 May;12(5):274–  
345 89.
- 346 2. Badon SE, Miller RS, Qiu C, Sorensen TK, Williams MA, Enquobahrie DA. Maternal healthy  
347 lifestyle during early pregnancy and offspring birthweight: differences by offspring sex. *J*  
348 *Matern-Fetal Neonatal Med Off J Eur Assoc Perinat Med Fed Asia Ocean Perinat Soc Int Soc*  
349 *Perinat Obstet*. 2018 May;31(9):1111–7.
- 350 3. Lu MS, Chen QZ, He JR, Wei XL, Lu JH, Li SH, et al. Maternal Dietary Patterns and Fetal  
351 Growth: A Large Prospective Cohort Study in China. *Nutrients*. 2016 Apr 28;8(5):E257.
- 352 4. Ae-Ngibise KA, Wylie BJ, Boamah-Kaali E, Jack DW, Oppong FB, Chillrud SN, et al. Prenatal  
353 maternal stress and birth outcomes in rural Ghana: sex-specific associations. *BMC Pregnancy*  
354 *Childbirth*. 2019 Oct 29;19(1):391.
- 355 5. Borge TC, Aase H, Brantsæter AL, Biele G. The importance of maternal diet quality during  
356 pregnancy on cognitive and behavioural outcomes in children: a systematic review and meta-  
357 analysis. *BMJ Open*. 2017 Sep 24;7(9):e016777.
- 358 6. Warner MJ, Ozanne SE. Mechanisms involved in the developmental programming of adulthood  
359 disease. *Biochem J*. 2010 Apr 14;427(3):333–47.

- 360 7. Steegers-Theunissen RP, Obermann-Borst SA, Kremer D, Lindemans J, Siebel C, Steegers EA,  
361 et al. Periconceptional Maternal Folic Acid Use of 400 µg per Day Is Related to Increased  
362 Methylation of the IGF2 Gene in the Very Young Child. PLOS ONE. 2009 Nov 16;4(11):e7845.
- 363 8. Barker DJP, Osmond C. INFANT MORTALITY, CHILDHOOD NUTRITION, AND  
364 ISCHAEMIC HEART DISEASE IN ENGLAND AND WALES. The Lancet. 1986 May  
365 10;327(8489):1077–81.
- 366 9. Barker DJP, Osmond C, Winter PD, Margetts B, Simmonds SJ. WEIGHT IN INFANCY AND  
367 DEATH FROM ISCHAEMIC HEART DISEASE. The Lancet. 1989 Sep 9;334(8663):577–80.
- 368 10. Barker DJP, Godfrey KM, Gluckman PD, Harding JE, Owens JA, Robinson JS. Fetal nutrition  
369 and cardiovascular disease in adult life. The Lancet. 1993 Apr 10;341(8850):938–41.
- 370 11. Barker D. Intrauterine programming of coronary heart disease and stroke. Acta Paediatr.  
371 1997;86(S423):178–82.
- 372 12. Christian P, Stewart CP. Maternal micronutrient deficiency, fetal development, and the risk of  
373 chronic disease. J Nutr. 2010 Mar;140(3):437–45.
- 374 13. Song X, Wei J, Shu J, Liu Y, Sun M, Zhu P, et al. Association of polymorphisms of FOLR1 gene  
375 and FOLR2 gene and maternal folic acid supplementation with risk of ventricular septal defect: a  
376 case-control study. Eur J Clin Nutr. 2022 Mar 10;
- 377 14. Ravelli A, van der Meulen J, Michels R, Osmond C, Barker D, Hales C, et al. Glucose tolerance  
378 in adults after prenatal exposure to famine. The Lancet. 1998 Jan 17;351(9097):173–7.
- 379 15. Pitkin RM. Folate and neural tube defects. Am J Clin Nutr. 2007 Jan;85(1):285S-288S.
- 380 16. Shaw GM, Carmichael SL, Yang W, Selvin S, Schaffer DM. Periconceptional dietary intake of  
381 choline and betaine and neural tube defects in offspring. Am J Epidemiol. 2004 Jul  
382 15;160(2):102–9.
- 383 17. Nyaradi A, Li J, Hickling S, Foster J, Oddy WH. The role of nutrition in children's  
384 neurocognitive development, from pregnancy through childhood. Front Hum Neurosci. 2013 Mar  
385 26;7:97.
- 386 18. Wachs TD. Nutritional deficits and behavioural development. Int J Behav Dev. 2000 Dec  
387 1;24(4):435–41.
- 388 19. Georgieff MK. Nutrition and the developing brain: nutrient priorities and measurement. Am J  
389 Clin Nutr. 2007 Feb;85(2):614S-620S.
- 390 20. Georgieff MK, Ramel SE, Cusick SE. Nutritional Influences on Brain Development. Acta  
391 Paediatr Oslo Nor 1992. 2018 Aug;107(8):1310–21.
- 392 21. Caffrey A, McNulty H, Rollins M, Prasad G, Gaur P, Talcott JB, et al. Effects of maternal folic  
393 acid supplementation during the second and third trimesters of pregnancy on neurocognitive  
394 development in the child: an 11-year follow-up from a randomised controlled trial. BMC Med.  
395 2021 Mar 10;19:73.

- 396 22. Huang RC, Mori TA, Beilin LJ. Early life programming of cardiometabolic disease in the  
397 Western Australian pregnancy cohort (Raine) study. *Clin Exp Pharmacol Physiol*. 2012  
398 Nov;39(11):973–8.
- 399 23. Heijmans BT, Tobi EW, Stein AD, Putter H, Blauw GJ, Susser ES, et al. Persistent epigenetic  
400 differences associated with prenatal exposure to famine in humans. *Proc Natl Acad Sci*. 2008  
401 Nov 4;105(44):17046–9.
- 402 24. Dominguez-Salas P, Cox SE, Prentice AM, Hennig BJ, Moore SE. Maternal nutritional status,  
403 C1 metabolism and offspring DNA methylation: a review of current evidence in human subjects.  
404 *Proc Nutr Soc*. 2012 Feb;71(1):154–65.
- 405 25. James P, Sajjadi S, Tomar AS, Saffari A, Fall CHD, Prentice AM, et al. Candidate genes linking  
406 maternal nutrient exposure to offspring health via DNA methylation: a review of existing  
407 evidence in humans with specific focus on one-carbon metabolism. *Int J Epidemiol*. 2018  
408 Dec;47(6):1910–37.
- 409 26. Bokor S, Vass RA, Funke S, Ertl T, Molnár D. Epigenetic Effect of Maternal Methyl-Group  
410 Donor Intake on Offspring’s Health and Disease. *Life*. 2022 Apr 19;12(5):609.
- 411 27. Peter CJ, Fischer LK, Kundakovic M, Garg P, Jakovcevski M, Dincer A, et al. DNA  
412 METHYLATION SIGNATURES OF EARLY CHILDHOOD MALNUTRITION  
413 ASSOCIATED WITH IMPAIRMENTS IN ATTENTION AND COGNITION. *Biol Psychiatry*.  
414 2016 Nov 15;80(10):765–74.
- 415 28. Guéant JL, Namour F, Guéant-Rodriguez RM, Daval JL. Folate and fetal programming: a play in  
416 epigenomics? *Trends Endocrinol Metab*. 2013 Jun 1;24(6):279–89.
- 417 29. Arima Y, Fukuoka H. Developmental origins of health and disease theory in cardiology. *J*  
418 *Cardiol*. 2020 Jul;76(1):14–7.
- 419 30. Forsdahl A. Living conditions in childhood and subsequent development of risk factors for  
420 arteriosclerotic heart disease. The cardiovascular survey in Finnmark 1974-75. *J Epidemiol*  
421 *Community Health*. 1978 Mar;32(1):34–7.
- 422 31. Thornburg KL, O’Tierney PF, Louey S. Review: The placenta is a programming agent for  
423 cardiovascular disease. *Placenta*. 2010 Mar;31 Suppl:S54-59.
- 424 32. Law CM, Shiell AW. Is blood pressure inversely related to birth weight? The strength of  
425 evidence from a systematic review of the literature. *J Hypertens*. 1996 Aug;14(8):935–41.
- 426 33. McKee SE, Reyes TM. Effect of supplementation with methyl-donor nutrients on  
427 neurodevelopment and cognition: considerations for future research. *Nutr Rev*. 2018  
428 Jul;76(7):497–511.
- 429 34. Fernandez-Osornio LF, Gomez-Diaz RA, Mondragon-Gonzalez R, Gonzalez-Carranza E, Diaz-  
430 Flores M, Sharma T, et al. Micronutrients of the one-carbon metabolism cycle are altered in  
431 mothers and neonates by gestational diabetes and are associated with weight, height and head  
432 circumference at birth. *J Nutr Biochem*. 2022 Jul 1;105:108996.

- 433 35. Naninck EFG, Stijger PC, Brouwer-Brolsma EM. The Importance of Maternal Folate Status for  
434 Brain Development and Function of Offspring. *Adv Nutr*. 2019 May;10(3):502–19.
- 435 36. Stamm RA, Houghton LA. Nutrient intake values for folate during pregnancy and lactation vary  
436 widely around the world. *Nutrients*. 2013 Sep 30;5(10):3920–47.
- 437 37. Mehedint MG, Craciunescu CN, Zeisel SH. Maternal dietary choline deficiency alters  
438 angiogenesis in fetal mouse hippocampus. *Proc Natl Acad Sci U S A*. 2010 Jul  
439 20;107(29):12834–9.
- 440 38. Deoni S, Dean D, Joelson S, O'Regan J, Schneider N. Early nutrition influences developmental  
441 myelination and cognition in infants and young children. *NeuroImage*. 2018 Sep;178:649–59.
- 442 39. Jadavji NM, Deng L, Malysheva O, Caudill MA, Rozen R. MTHFR deficiency or reduced intake  
443 of folate or choline in pregnant mice results in impaired short-term memory and increased  
444 apoptosis in the hippocampus of wild-type offspring. *Neuroscience*. 2015 Aug 6;300:1–9.
- 445 40. Schlotz W, Jones A, Phillips DIW, Gale CR, Robinson SM, Godfrey KM. Lower maternal folate  
446 status in early pregnancy is associated with childhood hyperactivity and peer problems in  
447 offspring. *J Child Psychol Psychiatry*. 2010 May;51(5):594–602.
- 448 41. Breimer LH, Nilsson TK. Has folate a role in the developing nervous system after birth and not  
449 just during embryogenesis and gestation? *Scand J Clin Lab Invest*. 2012 May;72(3):185–91.
- 450 42. Li M, Francis E, Hinkle SN, Ajarapu AS, Zhang C. Preconception and Prenatal Nutrition and  
451 Neurodevelopmental Disorders: A Systematic Review and Meta-Analysis. *Nutrients*. 2019 Jul  
452 17;11(7):E1628.
- 453 43. Prado EL, Dewey KG. Nutrition and brain development in early life. *Nutr Rev*. 2014  
454 Apr;72(4):267–84.
- 455 44. Antony AC. In utero physiology: role of folic acid in nutrient delivery and fetal development.  
456 *Am J Clin Nutr*. 2007 Feb;85(2):598S-603S.
- 457 45. Craciunescu CN, Brown EC, Mar MH, Albright CD, Nadeau MR, Zeisel SH. Folic Acid  
458 Deficiency During Late Gestation Decreases Progenitor Cell Proliferation and Increases  
459 Apoptosis in Fetal Mouse Brain. *J Nutr*. 2004 Jan 1;134(1):162–6.
- 460 46. Akchiche N, Bossenmeyer-Pouricé C, Kerek R, Martin N, Pouricé G, Koziel V, et al.  
461 Homocysteinylation of neuronal proteins contributes to folate deficiency-associated alterations of  
462 differentiation, vesicular transport, and plasticity in hippocampal neuronal cells. *FASEB J*.  
463 2012;26(10):3980–92.
- 464 47. Harlan De Crescenzo A, Panoutsopoulos AA, Tat L, Schaaf Z, Racherla S, Henderson L, et al.  
465 Deficient or Excess Folic Acid Supply During Pregnancy Alter Cortical Neurodevelopment in  
466 Mouse Offspring. *Cereb Cortex*. 2021 Jan 1;31(1):635–49.
- 467 48. Zhao Y, Chen D, Tang J, Zheng Y, Qi J, Wang H. Parental folate deficiency induces birth defects  
468 in mice accompanied with increased de novo mutations. *Cell Discov*. 2022 Feb 22;8(1):1–13.

- 469 49. FREEDMAN R, ROSS RG. Prenatal choline and the development of schizophrenia. Shanghai  
470 Arch Psychiatry. 2015 Apr 25;27(2):90–102.
- 471 50. Wang Y, Surzenko N, Friday WB, Zeisel SH. Maternal dietary intake of choline in mice  
472 regulates development of the cerebral cortex in the offspring. FASEB J. 2016 Apr;30(4):1566–  
473 78.
- 474 51. Jones JP, H. Meck W, Williams CL, Wilson WA, Swartzwelder HS. Choline availability to the  
475 developing rat fetus alters adult hippocampal long-term potentiation. Dev Brain Res. 1999 Dec  
476 10;118(1):159–67.
- 477 52. Glenn MJ, Gibson EM, Kirby ED, Mellott TJ, Blusztajn JK, Williams CL. Prenatal choline  
478 availability modulates hippocampal neurogenesis and neurogenic responses to enriching  
479 experiences in adult female rats. Eur J Neurosci. 2007 Apr;25(8):2473–82.
- 480 53. Ovbiagele B, Goldstein LB, Higashida RT, Howard VJ, Johnston SC, Khavjou OA, et al.  
481 Forecasting the Future of Stroke in the United States: A Policy Statement From the American  
482 Heart Association and American Stroke Association. Stroke. 2013 Aug 1;44(8):2361–75.
- 483 54. Mozaffarian D, Benjamin EJ, Go AS, Arnett DK, Blaha MJ, Cushman M, et al. Heart Disease  
484 and Stroke Statistics—2016 Update. :323.
- 485 55. Persky RW, Turtzo LC, McCullough LD. Stroke in Women: Disparities and Outcomes. Curr  
486 Cardiol Rep. 2010 Jan;12(1):6–13.
- 487 56. the Women Initiative for Stroke in Europe (WISE) group, Cordonnier C, Sprigg N, Sandset EC,  
488 Pavlovic A, Sunnerhagen KS, et al. Stroke in women — from evidence to inequalities. Nat Rev  
489 Neurol. 2017 Sep;13(9):521–32.
- 490 57. Macrae I. Preclinical stroke research - advantages and disadvantages of the most common rodent  
491 models of focal ischaemia: Animal models of focal cerebral ischaemia. Br J Pharmacol. 2011  
492 Oct;164(4):1062–78.
- 493 58. Singh D, Wasan H, Reeta KH. Preclinical Stroke Research and Translational Failure: A Bird’s  
494 Eye View on Preventable Variables. Cell Mol Neurobiol [Internet]. 2021 Mar 30 [cited 2021 Jun  
495 25]; Available from: <http://link.springer.com/10.1007/s10571-021-01083-6>
- 496 59. Jadavji NM, Emmerson JT, MacFarlane AJ, Willmore WG, Smith PD. B-vitamin and choline  
497 supplementation increases neuroplasticity and recovery after stroke. Neurobiol Dis. 2017  
498 Jul;103:89–100.
- 499 60. Jadavji NM, Farr TD, Lips J, Khalil AA, Boehm-Sturm P, Foddiss M, et al. Elevated levels of  
500 plasma homocysteine, deficiencies in dietary folic acid and uracil-DNA glycosylase impair  
501 learning in a mouse model of vascular cognitive impairment. Behav Brain Res. 2015 Apr  
502 15;283:215–26.
- 503 61. Dam K, Füchtmeier M, Farr TD, Boehm-Sturm P, Foddiss M, Dirnagl U, et al. Increased  
504 homocysteine levels impair reference memory and reduce cortical levels of acetylcholine in a  
505 mouse model of vascular cognitive impairment. Behav Brain Res. 2017 Mar 15;321:201–8.



- 506 62. Jadavji NM, Emmerson JT, Shanmugalingam U, MacFarlane AJ, Willmore WG, Smith PD. A  
507 genetic deficiency in folic acid metabolism impairs recovery after ischemic stroke. *Exp Neurol*.  
508 2018 Nov;309:14–22.
- 509 63. Jadavji NM, Mosnier H, Kelly E, Lawrence K, Cruickshank S, Stacey S, et al. One-carbon  
510 metabolism supplementation improves outcome after stroke in aged male MTHFR-deficient  
511 mice. *Neurobiol Dis*. 2019 Dec;132:104613.
- 512 64. Abato JE, Moftah M, Cron GO, Smith PD, Jadavji NM. Methylenetetrahydrofolate reductase  
513 deficiency alters cellular response after ischemic stroke in male mice. *Nutr Neurosci* [Internet].  
514 2020; Available from: <https://pubmed.ncbi.nlm.nih.gov/32448097/>
- 515 65. Esfandiarei M, Hoxha B, Talley NA, Anderson MR, Alkhouli MF, Squire MA, et al. Beneficial  
516 effects of resveratrol and exercise training on cardiac and aortic function and structure in the  
517 3xTg mouse model of Alzheimer’s disease. *Drug Des Devel Ther*. 2019 Apr 17;13:1197–211.
- 518 66. Kuechenmeister B, Gusek B, Jones TB, Esfandiarei M. Evaluation of the effects of Marfan  
519 pathogenesis and losartan treatment on coronary and cerebral arteries in the well-established  
520 Marfan Syndrome mouse model. *FASEB J* [Internet]. 2021 [cited 2022 Jul 28];35(S1). Available  
521 from: <https://onlinelibrary.wiley.com/doi/abs/10.1096/fasebj.2021.35.S1.03693>
- 522 67. Purkayastha S, Sorond F. Transcranial Doppler Ultrasound: Technique and Application. *Semin*  
523 *Neurol*. 2012 Sep;32(4):411–20.
- 524 68. Aaslid R, Markwalder TM, Nornes H. Noninvasive transcranial Doppler ultrasound recording of  
525 flow velocity in basal cerebral arteries. *J Neurosurg*. 1982 Dec;57(6):769–74.
- 526 69. Whiteus C, Freitas C, Grutzendler J. Perturbed neural activity disrupts cerebral angiogenesis  
527 during a postnatal critical period. *Nature*. 2014 Jan 16;505(7483):407–11.
- 528 70. Peguera B, Segarra M, Acker-Palmer A. Neurovascular crosstalk coordinates the central nervous  
529 system development. *Curr Opin Neurobiol*. 2021 Aug;69:202–13.
- 530 71. Paredes I, Himmels P, Ruiz de Almodóvar C. Neurovascular Communication during CNS  
531 Development. *Dev Cell*. 2018 Apr 9;45(1):10–32.
- 532 72. Tata M, Ruhrberg C. Cross-talk between blood vessels and neural progenitors in the developing  
533 brain. *Neuronal Signal*. 2018 Mar 30;2(1):NS20170139.
- 534 73. Wang L, Xiong X, Zhang L, Shen J. Neurovascular Unit: A critical role in ischemic stroke. *CNS*  
535 *Neurosci Ther*. 2021;27(1):7–16.
- 536 74. Lecrux C, Hamel E. The neurovascular unit in brain function and disease. *Acta Physiol Oxf Engl*.  
537 2011 Sep;203(1):47–59.
- 538 75. Guan J, Pavlovic D, Dalkie N, Waldvogel HJ, O’Carroll SJ, Green CR, et al. Vascular  
539 Degeneration in Parkinson’s Disease. *Brain Pathol*. 2012 Sep 13;23(2):154–64.

- 540 76. Murphy MJ, Grace GM, Tartaglia MC, Orange JB, Chen X, Rowe A, et al. Widespread cerebral  
541 haemodynamics disturbances occur early in amyotrophic lateral sclerosis. *Amyotroph Lateral*  
542 *Scler Off Publ World Fed Neurol Res Group Mot Neuron Dis*. 2012 Feb;13(2):202–9.
- 543 77. Kisler K, Nelson AR, Montagne A, Zlokovic BV. Cerebral blood flow regulation and  
544 neurovascular dysfunction in Alzheimer’s disease. *Nat Rev Neurosci*. 2017 Jul;18(7):419–34.
- 545 78. Toledo JB, Arnold SE, Raible K, Brettschneider J, Xie SX, Grossman M, et al. Contribution of  
546 cerebrovascular disease in autopsy confirmed neurodegenerative disease cases in the National  
547 Alzheimer’s Coordinating Centre. *Brain*. 2013 Sep;136(9):2697–706.
- 548 79. Muoio V, Persson PB, Sendeski MM. The neurovascular unit – concept review. *Acta Physiol*.  
549 2014;210(4):790–8.
- 550 80. Contu L, Nizari S, Heath CJ, Hawkes CA. Pre- and Post-natal High Fat Feeding Differentially  
551 Affects the Structure and Integrity of the Neurovascular Unit of 16-Month Old Male and Female  
552 Mice. *Front Neurosci*. 2019;13:1045.
- 553 81. Bordeleau M, Comin CH, Fernández de Cossío L, Lacabanne C, Freitas-Andrade M, González  
554 Ibáñez F, et al. Maternal high-fat diet in mice induces cerebrovascular, microglial and long-term  
555 behavioural alterations in offspring. *Commun Biol*. 2022 Jan 11;5(1):1–13.
- 556 82. Bordeleau M, Fernández de Cossío L, Chakravarty MM, Tremblay MÈ. From Maternal Diet to  
557 Neurodevelopmental Disorders: A Story of Neuroinflammation. *Front Cell Neurosci* [Internet].  
558 2021 [cited 2022 May 24];14. Available from:  
559 <https://www.frontiersin.org/article/10.3389/fncel.2020.612705>
- 560 83. Xiong B, Li A, Lou Y, Chen S, Long B, Peng J, et al. Precise Cerebral Vascular Atlas in  
561 Stereotaxic Coordinates of Whole Mouse Brain. *Front Neuroanat* [Internet]. 2017 [cited 2022  
562 Aug 4];11. Available from: <https://www.frontiersin.org/articles/10.3389/fnana.2017.00128>
- 563 84. Haubrich C, Wendt A, Diehl R r., Klötzsch C. Dynamic Autoregulation Testing in the Posterior  
564 Cerebral Artery. *Stroke*. 2004 Apr;35(4):848–52.
- 565 85. Zeisel SH. Nutritional importance of choline for brain development. *J Am Coll Nutr*. 2004  
566 Dec;23(6 Suppl):621S-626S.
- 567 86. Radziejewska A, Chmurzynska A. Folate and choline absorption and uptake: Their role in fetal  
568 development. *Biochimie*. 2019 Mar 1;158:10–9.
- 569 87. Jiang X, Bar HY, Yan J, Jones S, Brannon PM, West AA, et al. A higher maternal choline intake  
570 among third-trimester pregnant women lowers placental and circulating concentrations of the  
571 antiangiogenic factor fms-like tyrosine kinase-1 (sFLT1). *FASEB J*. 2013;27(3):1245–53.
- 572 88. Zhang LC, Jin X, Huang Z, Yan ZN, Li PB, Duan RF, et al. Protective effects of choline against  
573 hypoxia-induced injuries of vessels and endothelial cells. *Exp Ther Med*. 2017 May;13(5):2316–  
574 24.

- 575 89. Chan J, Deng L, Mikael LG, Yan J, Pickell L, Wu Q, et al. Low dietary choline and low dietary  
576 riboflavin during pregnancy influence reproductive outcomes and heart development in mice.  
577 *Am J Clin Nutr.* 2010 Apr 1;91(4):1035–43.
- 578 90. Sotres-Alvarez D, Siega-Riz AM, Herring AH, Carmichael SL, Feldkamp ML, Hobbs CA, et al.  
579 Maternal Dietary Patterns are Associated With Risk of Neural Tube and Congenital Heart  
580 Defects. *Am J Epidemiol.* 2013 Jun 1;177(11):1279–88.
- 581 91. Golzarand M, Mirmiran P, Azizi F. Association between dietary choline and betaine intake and  
582 10.6-year cardiovascular disease in adults. *Nutr J.* 2022 Jan 5;21(1):1.
- 583 92. Liu L, Lu Y, Bi X, Xu M, Yu X, Xue R, et al. Choline ameliorates cardiovascular damage by  
584 improving vagal activity and inhibiting the inflammatory response in spontaneously hypertensive  
585 rats. *Sci Rep.* 2017 Feb 22;7(1):42553.
- 586 93. Bohm M, Cotton D, Foster L, Custodis F, Laufs U, Sacco R, et al. Impact of resting heart rate on  
587 mortality, disability and cognitive decline in patients after ischaemic stroke. *Eur Heart J.* 2012  
588 Nov 2;33(22):2804–12.
- 589 94. Custodis F, Gertz K, Balkaya M, Prinz V, Mathar I, Stamm C, et al. Heart Rate Contributes to the  
590 Vascular Effects of Chronic Mental Stress. *Stroke.* 2011 Jun;42(6):1742–9.
- 591 95. Laufs U, Gertz K, Dirnagl U, Böhm M, Nickenig G, Endres M. Rosuvastatin, a new HMG-CoA  
592 reductase inhibitor, upregulates endothelial nitric oxide synthase and protects from ischemic  
593 stroke in mice. *Brain Res.* 2002 Jun 28;942(1):23–30.
- 594 96. Bolduc V, Drouin A, Gillis MA, Duquette N, Thorin-Trescases N, Frayne-Robillard I, et al.  
595 Heart rate-associated mechanical stress impairs carotid but not cerebral artery compliance in  
596 dyslipidemic atherosclerotic mice. *Am J Physiol-Heart Circ Physiol.* 2011 Nov;301(5):H2081–  
597 92.
- 598 97. Yabluchanskiy A, Nyul-Toth A, Csiszar A, Gulej R, Saunders D, Towner R, et al. Age-related  
599 alterations in the cerebrovasculature affect neurovascular coupling and BOLD fMRI responses:  
600 Insights from animal models of aging. *Psychophysiology.* 2021;58(7):e13718.
- 601 98. Hakim MA, Chum PP, Buchholz JN, Behringer EJ. Aging Alters Cerebrovascular Endothelial  
602 GPCR and K<sup>+</sup> Channel Function: Divergent Role of Biological Sex. *J Gerontol A Biol Sci Med*  
603 *Sci.* 2020 Oct 15;75(11):2064–73.
- 604 99. Mandalà M, Pedatella AL, Morales Palomares S, Cipolla MJ, Osol G. Maturation is associated  
605 with changes in rat cerebral artery structure, biomechanical properties and tone. *Acta Physiol Oxf*  
606 *Engl.* 2012 Jul;205(3):363–71.
- 607 100. Caporarello N, Meridew JA, Aravamudhan A, Jones DL, Austin SA, Pham TX, et al.  
608 Vascular dysfunction in aged mice contributes to persistent lung fibrosis. *Aging Cell.* 2020  
609 Aug;19(8):e13196.
- 610 101. Donato AJ, Machin DR, Lesniewski LA. Mechanisms of Dysfunction in the Aging  
611 Vasculature and Role in Age-Related Disease. *Circ Res.* 2018 Sep 14;123(7):825–48.

- 612 102. Barros PR, Costa TJ, Akamine EH, Tostes RC. Vascular Aging in Rodent Models:  
613 Contrasting Mechanisms Driving the Female and Male Vascular Senescence. *Front Aging*. 2021  
614 Sep 8;2:727604.
- 615 103. Anderson HV, Stokes MJ, Leon M, Abu-Halawa SA, Stuart Y, Kirkeeide RL. Coronary  
616 Artery Flow Velocity Is Related To Lumen Area and Regional Left Ventricular Mass.  
617 *Circulation*. 2000 Jul 4;102(1):48–54.
- 618 104. Global, regional, and national incidence, prevalence, and years lived with disability for 354  
619 diseases and injuries for 195 countries and territories, 1990–2017: a systematic analysis for the  
620 Global Burden of Disease Study 2017. *Lancet Lond Engl*. 2018 Nov 10;392(10159):1789–858.
- 621 105. Kosaraju A, Goyal A, Grigorova Y, Makaryus AN. Left Ventricular Ejection Fraction. In:  
622 StatPearls [Internet]. Treasure Island (FL): StatPearls Publishing; 2022 [cited 2022 Aug 5].  
623 Available from: <http://www.ncbi.nlm.nih.gov/books/NBK459131/>
- 624 106. Becklake MR, Frank H, Dagenais GR, Ostiguy GL, Guzman CA. Influence of age and sex on  
625 exercise cardiac output. *J Appl Physiol*. 1965 Sep;20(5):938–47.
- 626 107. McEniery CM, Yasmin, Hall IR, Qasem A, Wilkinson IB, Cockcroft JR. Normal Vascular  
627 Aging: Differential Effects on Wave Reflection and Aortic Pulse Wave Velocity: The Anglo-  
628 Cardiff Collaborative Trial (ACCT). *J Am Coll Cardiol*. 2005 Nov 1;46(9):1753–60.
- 629
- 630

631 The following formatting styles are meant as a guide, as long as the full citation is complete and  
632 clear, Frontiers referencing style will be applied during typesetting.

### 633 **7.1 Harvard Referencing Style (Author-Date)**

634 Many Frontiers journals use the Harvard referencing system (Author-date), to find the style and  
635 resources for the journal you are submitting to please go [here](#). For Humanities and Social Sciences  
636 articles please include page numbers in the in-text citations

637 For some examples please click [here](#).

638 For more examples of citing other documents and general questions regarding Harvard reference  
639 style, please refer to the [Chicago Manual of Style](#).

### 640 **7.2 Vancouver Referencing Style (Numbered)**

641 Many Frontiers journals use the numbered referencing system, to find the style and resources for the  
642 journal you are submitting to please go [here](#). In-text citations should be numbered consecutively in  
643 order of appearance in the text – identified by Arabic numerals in the parenthesis [square parenthesis  
644 for Physics and Mathematics].

645 For some examples please click [here](#).

646 For more examples of citing other documents and general questions regarding Vancouver reference  
647 style, please refer to [Citing Medicine](#).

## 648 **8 Supplementary Material**

649 Supplementary Material should be uploaded separately on submission, if there are Supplementary  
650 Figures, please include the caption in the same file as the figure. Supplementary Material templates  
651 can be found in the Frontiers Word Templates file.

652 Please see the [Supplementary Material section of the Author guidelines](#) for details on the different  
653 file types accepted.

## 654 **9 Data Availability Statement**

655 The datasets [GENERATED/ANALYZED] for this study can be found in the [NAME OF  
656 REPOSITORY] [LINK]. Please see the [Data Availability section of the Author guidelines](#) for more  
657 details.
